1                                    **A dynamic control of human telomerase holoenzyme**

2    Mohammed E. Sayed<sup>1,2#</sup>, Ao Cheng<sup>1,3#</sup>, Gaya Yadav<sup>4</sup>, Andrew T. Ludlow<sup>1,2</sup>, Jerry W. Shay<sup>1</sup>,  
3    Woodring E. Wright<sup>1</sup> and Qiu-Xing Jiang<sup>4\*</sup>

4            1. Department of Cell Biology, University of Texas Southwestern Medical Center, Dallas,  
5            TX 75390, USA.

6            2. School of Kinesiology Integrative Molecular Genetics Lab, University of Michigan, Ann  
7            Arbor, MI 48109, USA.

8            3. Department of Diagnostic and Biological Sciences, University of Minnesota,  
9            Minneapolis, MN 55455, USA.

10           4. Department of Microbiology and Cell Science, University of Florida, Gainesville, FL  
11           32611, USA.

12    # Authors of equal contribution

13

14    \* Correspondence author:    Qiu-Xing Jiang, Ph.D.

15                                    Email: [qxjiang@ufl.edu](mailto:qxjiang@ufl.edu)      Phone: 352-846-0953

16

17 **Short running title:** Use-dependent control of telomerase activity

18

19 **Keywords:** Catalysis-dependent inactivation, monomers and dimers, catalytic sites, tandem  
20 action, intracellular telomerase activating factors (iTAFs), telomerase reactivation by iTAFs,  
21 single-run catalysis, fast and slow active sites, kinetics and thermodynamics

22

23 **ABSTRACT:**

24 Human telomerase functions in maintaining genome stability by adding telomeric repeats to the  
25 termini of linear chromosomes. Past studies have revealed profound insights into telomerase  
26 functions. However, low abundance of functional telomerase and difficulty in quantifying its  
27 activity leave partially characterized its thermodynamic and kinetic properties. Using a newly  
28 developed method to count individual extension products, we demonstrate that human  
29 telomerase holoenzymes contain fast- and slow-acting catalytic sites. Surprisingly, both active  
30 sites become inactive after two consecutive rounds of catalysis. The fast active sites turn off ~40-  
31 fold quicker than the slow ones and exhibit higher affinity to substrates. In dimeric enzymes, the  
32 two sites work in tandem with the faster site functioning before the slower one. In monomeric  
33 enzymes, the active sites also perform single-run catalysis. Interestingly, the inactive enzymes  
34 can be reactivated by intracellular telomerase-activating factors (iTAFs) available in multiple  
35 cell types. Together, the single-run catalysis and the iTAF-triggered reactivation serve as a novel  
36 control circuit to ensure that the telomerase holoenzymes are dynamically controlled to match  
37 their number of active sites with the number of telomeres they extend. Such exquisite kinetic  
38 control of telomerase activity is expected to play important roles in cell division and ageing.

39

## 40 INTRODUCTION

41 Telomeres refer to the terminal sequences of linear chromosomes in eukaryotic cells <sup>1</sup>. Their  
42 catalytic extension provides an evolutionarily conserved solution to the “end replication”  
43 problem. To maintain proper telomeric length, eukaryotic cells utilize telomerase to catalyze  
44 addition of telomeric repeats using an intrinsic RNA template. In human cells, telomerase adds  
45 hexameric repeats, (TTAGGG)<sub>n</sub>, to chromosomal termini <sup>2</sup>. During a cell cycle, a telomerase  
46 enzyme is recruited to a transiently-uncapped telomere before it can function in a controlled  
47 fashion <sup>3</sup>. It is believed that the telomerase preferentially acts on shorter telomeres <sup>4-8</sup>. Every  
48 telomere should be acted on in order to maintain proper telomere length equilibrium; otherwise,  
49 some telomeres would become shorter over time, leading to cellular senescence <sup>9</sup>. How  
50 telomerase-expressing cells regulate telomere length in a global scale remains unclear.

51

52 Telomerase plays a critical role in human diseases, in particular cancers and other age-related  
53 diseases. With down-regulated telomerase activity, differentiating cells reach a critical state after  
54 a certain number of cell divisions such that the cell cycle will be arrested and cells will enter  
55 “senescence”. How a cell senses changes in telomere length before senescence remains a  
56 mystery. Approximately 85-90% of human cancers exhibit elevated telomerase activity <sup>1, 10-18</sup>.  
57 The importance of telomerase activity to cancer cells and other proliferative stem-like cells has  
58 been well demonstrated. Chemical inhibitors and activators of human telomerase are being  
59 explored for cancer treatment and anti-ageing therapies, respectively <sup>19-21</sup>. These two aspects  
60 make the structural and functional studies of human telomerase and telomere maintenance a key  
61 area in cell biology and cancer biology <sup>22-30</sup>.

62

63 In human cells, the telomerase holoenzymes are heterogeneous and contain both monomers and  
64 dimers <sup>31</sup>. A dimeric holoenzyme contains two copies of hTERT (telomeric reverse  
65 transcriptase), dyskerin and hTR (Telomerase RNA component) as well as other factors. It has  
66 an apparent mass of ~700 kDa <sup>12, 32, 33</sup>. A monomeric telomerase holoenzyme has one copy of  
67 hTERT, hTR, and TCAB1, and two copies of NHP2, dyskerin, NOP10, and GAR1 as recently  
68 resolved by cryoEM <sup>34</sup>, and is of similar size as the dimeric form. Each monomer has one active  
69 site. By reconstitution in cultured cells, every hTERT/hTR pair forms a minimally active enzyme  
70 that has one active site <sup>35</sup>. A proliferating human cell may have 50-100 copies of functional  
71 enzymes <sup>9, 36</sup>. It remains unclear how free telomerase complexes are physically recruited to  
72 recognize the telomeres when chromosomal 3'-overhangs become accessible (uncapped) during  
73 the S phase; Nor is it well understood how a telomerase adds telomeric repeats in a processive  
74 fashion or finishes the reaction when the enzyme stochastically falls off its product <sup>9, 37-41</sup>.  
75 Energetically, telomerase uses the chemical energy from dNTP hydrolysis to catalyze its RNA-  
76 guided DNA synthesis. For every six-nucleotide repeat, perhaps following a Boltzmann  
77 distribution among the states with different numbers of nucleotides added, the DNA-RNA  
78 hybrids are presumably most stable when all six positions are paired, explaining the main peaks  
79 for every repeat addition observed by gel-based activity assays. For processive extension, an  
80 energetically costly step is expected to melt the DNA-RNA hybrid in order to translocate the  
81 substrate by six nucleotides or fall off from the product sporadically to terminate the reaction.  
82 The kinetics and the mechanistic programs for the processive addition of telomeric repeats by  
83 telomerase are yet to be elucidated.

84

85 Prior studies of the human telomerase holoenzyme have revealed important insights<sup>12, 42, 43</sup>, but  
86 the dynamic control for its catalytic activity, the structural relationship between hTR and hTERT  
87 subunits and the interactions between the telomerase holoenzyme and its substrates remain  
88 incompletely understood. Semi-quantitative analyses by gel-based direct or TRAP assays have  
89 derived incomplete kinetic and thermodynamic properties of telomerase, partially because low  
90 abundance of telomerase has significantly limited quantitative analysis. In this study, we will use  
91 quantitative analysis to reveal an unexpected kinetic property of human telomerase.

92

## 93 **RESULTS**

### 94 **In single-turnover settings, human telomerase becomes inactive after two sequential runs of** 95 **catalysis**

96 In order to analyze telomerase activity quantitatively, we took advantage of telomerase's ability  
97 to stably bind telomeric repeats (TTAGGG)<sub>3</sub> (R3) at the GGG position, but quickly fall off when  
98 it adds three nucleotides to the substrate and reaches the TTA position *in vitro* (**Fig. 1A**)<sup>32</sup>. *Each*  
99 *addition of TTA is thus half a telomeric repeat and constitutes a single-turnover condition for*  
100 *analyzing the catalytic activity*. A single-step pull-down using triple telomeric repeats as ligands  
101 enriched active enzymes directly from cell lysates (Supplementary **Fig. S1A**), which contained  
102 both monomers and dimers<sup>31</sup>. When studying the macroscopic, thermodynamic behavior of  
103 telomerase, we were not able to computationally separate the monomers from the dimers as what  
104 was done during cryoEM analysis or as in single molecule enzymology<sup>34, 44</sup>. Instead, we used  
105 two sequential pull-downs to separate the dimers from the monomers. A conventional TRAP  
106 assay, using lysates from 50, 500 and 5000 cells as a control, showed that a single-step pulldown

107 sequestered approximately 25% of the total activity (Supplementary **Fig. S1A**), which is not  
108 surprising because only enzyme molecules with their active sites accessible to substrates were  
109 pulled down.

110

111 Our data also show that the gel-based TRAP assay is insensitive to changes of telomerase  
112 activity by less than five folds. The direct assays based on radioactivity suffered from similar  
113 insensitivity and non-linearity. To increase the amount of telomerase for experiments, we  
114 generated a stable cell line overexpressing both hTR and N-terminally biotinylated hTERT  
115 (Supplementary **Fig. S2A**). When compared with parental H1299 cells and stable H1299 cells  
116 overexpressing hTERT alone by the gel-based TRAP assay, the engineered cells had ~20 fold  
117 more activity (Supplementary **Fig. S3A**), and will be called the *super H1299*. The biotinylation  
118 was accomplished by the mammalian biotinylation machinery inside the cells<sup>45</sup>. When incubated  
119 with streptavidin-coated beads, the biotinylated telomerase bound to the beads, but the  
120 endogenous enzyme did not (supplementary **Fig. S2B** vs. **S2C**), suggesting that the recombinant  
121 hTERT, ~10 kDa heavier than the endogenous one in SDS-PAGE, was indeed biotinylated.  
122 Biotinylation provided an effective way to selectively enrich recombinant telomerase, and  
123 allowed the separation of the recombinant hTERT from the endogenous hTERT as well as  
124 possible contaminating proteins (supplementary **Fig. S3B-C**).

125

126 We used a two-step pull-down procedure in order to enrich selectively endogenous telomerase  
127 holoenzymes (**Fig. 1A**). Between the two steps, apyrase was introduced to remove dATP/dTTP  
128 from the eluate of the first pulldown (Supplementary **Fig. S4**). An aliquot of the sample loaded to

129 the substrate (R3) beads, equivalent to the enzymes from 5,000 parental H1299 cells, was  
130 analyzed (Input in **Fig. 1B**). Equivalent samples (cell equivalency) from other fractions were  
131 analyzed as well. A small amount of activity (<10%) showed in the flow-through (FT in **Fig.**  
132 **1B**). After two washing steps, the eluted fractions showed strong activity (~25%; Elution 1 in  
133 **Fig. 1B**). Based on the test results in supplementary **Fig. S4**, 0.1 units of apyrase were introduced  
134 to hydrolyze dTTP and dATP in the Elution 1 before the eluate was mixed to fresh R3 beads  
135 (Input 2 in **Fig. 1B**). Surprisingly, although we expected to recover ~25% of the loaded  
136 telomerase activity in the second eluate, literally no activity was detected in all subsequent  
137 fractions (FT2, Wash 1 & 2, and Elution 2 in **Fig. 1B**), suggesting that after binding to fresh  
138 substrates and / or performing the second round of 3-nucleotide extension, telomerase became  
139 inactive (**Figs. 1A & 1B**). To highlight this point, 100 x more materials, equivalent to those  
140 from 500,000 cells, for all fractions from the second pull-down were analyzed in the gel-based  
141 TRAP assay [Elution 2 (500,000) in Fig. 1B].

142

143 The surprising results in **Fig. 1B** suggested the possibility that the telomerase holoenzyme, once  
144 separated from the other components of the cell lysates, shuts itself off after *two runs of short 3-*  
145 *nucleotide single-turnover extension reactions*. To examine if this observation stemmed from the  
146 apyrase treatment or the short single-turnover extensions, we tethered biotinylated telomerase  
147 from super H1299 cells to streptavidin-coated beads and used a more quantitative digital droplet  
148 TRAP assay (ddTRAP) to count individual extension products. *ddTRAP is accurate to one*  
149 *extension product, and is much more sensitive than both the direct methods and the conventional*  
150 *TRAP assays. It is linear in a broad dynamic range of the extension products being detected in*  
151 *our experiments*<sup>46</sup>. On the beads, streptavidin molecules were at least 50 nm apart such that the



152 telomerase holoenzymes tethered on the beads could not physically interact with each other. The  
153 ddTRAP assay counted individual extension products in an all-or-none fashion, only registering  
154 the frequency of successful catalytic interactions between the enzymes and the DNA substrates  
155 (TS primers) without measuring the length of the products. Careful comparison has found that  
156 within the proper concentration ranges of the reactants, the results of ddTRAP with those are  
157 linearly proportionate with the conventional TRAP assay that counts the length of processive  
158 reactions<sup>47</sup>. The ddTRAP is more precise in quantification and fast for high-throughput analysis,  
159 and thus suitable for our analysis.

160

161 When analyzed in a time-lapsed fashion, the tethered telomerase was stable for at least 4-5 hours  
162 at room temperature (**Fig. 1C and Fig. 2A-B**), suitable for the kinetic analysis. After each run of  
163 processive extension, longer than the half-turn addition of 3-nucleotides in **Fig. 1A**, the products  
164 were separated from the enzymes and quantified (**Fig. 1D**). During the second run (Ext 2 in **Fig.**  
165 **1D**), the reaction products were 60-70% of those from the first run (Ext 1). During the third run  
166 (Ext 3), the yield dropped to < 10% of those in the first run with the same amount of tethered  
167 enzyme. As a control, the same enzyme preparation going through the same mechanical  
168 manipulations for three rounds without seeing the telomeric TS primers (DNA substrates) in the  
169 first two runs generated nearly the same amount of products (Ext 1\* in **Fig. 1D**) as the first run  
170 (Ext). This indicated that the waiting time and the manipulations through tethering and washing  
171 caused no substantial loss of activity in our assays. The loss of activity is thus *use-dependent*.

172

173 The loss of telomerase activity after two single-turnover runs of catalysis might result from  
174 multiple possibilities. To name a few, telomerase may be degraded or lost during the apyrase  
175 treatment, its RNA component (hTR) might dissociate from the complex, one or more of its  
176 intrinsic accessory factors might fall off after catalysis, or the products from its extension  
177 reaction might cause inhibition even in the presence of a saturating concentration of substrates.  
178 We tested all of these possibilities. First, partially purified telomerase using streptavidin-beads or  
179 other methods were stable for a few days at 4 °C (**Fig. 2A** and Supplementary **Figs S5A-C**) or  
180 for 5-6 hours at room temperature (**Fig. 2B**) with the loss of activity limited to 5-15%. The  
181 endogenous telomerase directly from cell lysates, which also shut off after two runs of  
182 extensions, lost a bit more activity (35%) over a period of 5 hours (Supplementary **Fig. 1B**), but  
183 it is much lower than the > 90% use-dependent loss. We thus preferentially used partially  
184 purified enzymes for our studies.

185

186 Second, western blot of both endogenous and recombinant hTERT found that the tethered  
187 enzymes after two rounds of extension reactions (**Fig. 1D**) suffered from no obvious hTERT  
188 degradation (**Fig. 2C**). Third, RT-qPCR analysis of the hTR content found that the “Elution 2”  
189 fraction in **Fig. 1B** had ~25% of the hTR in the Elution 1 as we expected, but ZERO activity in  
190 even 100 x more materials (**Fig 1B** & supplementary **Fig. S6**). Fourth, using the recombinant  
191 telomerase containing the N-terminally biotinylated hTERT (supplementary **Fig. S3A** and **Fig.**  
192 **1C**), we started one reaction with a batch of fresh enzyme and after 2 hours, separated the  
193 enzymes from the products. When fresh telomerase was added into the reaction mixture that  
194 contained the products from the first round of catalysis, it produced a similar amount of products  
195 (the total product amount doubled as in **Fig. 2D**). No product inhibition existed for telomerase.

196

197 Fifth, when ddPCR was used to detect reverse-transcripts of hTR extracted from the tethered  
198 enzymes (**Fig. 2E**), almost all hTR was retained with the tethered enzymes, suggesting that the  
199 tethered telomerase holoenzyme did not fall apart. Last, when the holoenzymes after multiple  
200 manipulations were blotted for dyskerin, NHP2 and NOP10, all three accessory proteinaceous  
201 factors of the active enzymes were retained (**Fig. S5D**), suggesting that the key protein factors  
202 were still retained because the enzyme did not fall apart, although we could not rule out that an  
203 unknown factor fell off the holoenzyme. These data revealed the integrity of a telomerase RNP  
204 complex by retaining the core components of hTERT, hTERC and key protein factors (**Fig. 2F**).  
205 Together these experiments demonstrated that the use-dependent loss of telomerase activity was  
206 not caused by chromatographic manipulations, apyrase treatment, instability or degradation of  
207 the holoenzyme, hTR dissociation, release of key accessory factors or product inhibition.

208

209 Uses-dependent loss of activity is not unusual. Conventional “single turnover” enzymes are good  
210 examples. With saturating substrates, a normal enzyme catalyzes a reaction continuously with a  
211 linear increase of products over a long period of time (red dashed lines in **Figs. 4A-B, 4E-F**). A  
212 single-turnover enzyme, however, is self-limiting by turning itself off after one round of  
213 catalysis. In a similar fashion, human telomerase shuts off after two runs of single-turnover  
214 processive extension. At the molecular level, there are three potential explanations. One is that  
215 each enzyme, e.g. monomeric telomerase, has only one active site, which has the same affinity to  
216 the substrates, and is able to count the rounds of its catalysis and shut itself off after exactly two  
217 rounds. As a thermodynamic system, such counting in an exact fashion is improbable. The

218 second possibility is that there are two types of monomeric enzymes, such as monomeric  
219 telomerase holoenzymes made of the core factors and different factors and named as  $fM_1$  and  
220  $sM_1$ , whose active sites differ. The  $fM_1$  functions mainly in the first round of catalysis and the  
221  $sM_1$ , a good fraction of which does not bind to the TS primers in the first round, works in the  
222 second. Third, there are two types of active sites in a dimeric enzyme, both of which shut off  
223 after two separate reactions. The dimeric enzymes may co-exist with  $fM_1$  or both  $fM_1$  and  $sM_1$ ,  
224 especially in consideration of the mixture of dimers and monomers seen by cryoEM<sup>34</sup>.

225

### 226 **Human telomerase holoenzyme from super H1299 cells is heterogeneous in composition.**

227 In literature, the telomerase holoenzymes in human cells are heterogeneous, containing both  
228 dimers and monomers<sup>32, 48-50</sup>. Minimally active hTERT/hTR complex is monomeric with only  
229 one active site and simple kinetic behavior<sup>35</sup>; but without other protein components of the  
230 holoenzyme (Supplementary **Fig. S5D**), it may be absent of real physiology. Enzymes attached  
231 to slides or exposed to or near air-water interfaces were found to be a mixture of both dimers and  
232 monomers. It is unclear whether such operations might change the ratio of dimers to monomers  
233<sup>31</sup>. The acutely assembled monomeric enzymes analyzed by cryoEM showed a complex of ~590  
234 kDa. To evaluate our recombinant enzymes, we used a continuous glycerol gradient to separate  
235 active enzymes from cell lysates. Thyroglobulin (~669 kDa), a molecular weight marker, was  
236 used as a landmark in our gradient (**Fig 3A**, fractions F7/F8). Western blotting found that the  
237 fractionated enzymes from the super-H1299 cells were distributed near the bottom of the density  
238 gradient (F8-F11), suggesting that the holoenzymes are quite heterogeneous in size, apparently  
239 heavier than a 669 kDa globular protein (**Fig. 3B-C**). Here we did not take consideration of

240 variations in partial specific volumes, frictional resistance, and solution viscosity and density for  
241 individual proteins because they are difficult to measure for each complex individually. Instead,  
242 we used a molecular weight marker. Similarly, size-exclusion chromatography of the glycerol-  
243 gradient fractions in a Superose 6 column found that a major fraction of the telomerase had a  
244 retention volume of 11-19 ml, equivalent to globular proteins in a broad range of ~0.3-0.9 MDa  
245 (**Fig. 3D**). The gel-based TRAP assay showed that the active human telomerase holoenzymes  
246 may be larger or smaller than the thyroglobulin (669 kDa) in size. Even though 700 kDa dimers  
247 and the 590 kDa monomers were not separated well in the density gradient or by size-exclusion  
248 chromatography, the active enzymes isolated from the super H1299 cells show heterogeneous  
249 composition containing both monomers and dimers as reported before<sup>34,31,51</sup>.

250

### 251 **Time-lapse experiments reveal two distinct active sites for human telomerase**

252 Partially fractionated telomerase holoenzymes were sufficiently stable for measurements in a  
253 period of 3 to 6 hours (**Fig. 2A**). The same was found to be true for telomerase enriched in  
254 glycerol-gradient fractions of cell lysates (**Fig. 3D**), the fractions eluted from single-step  
255 pulldown (**Fig 1B**), and the fractions of the biotinylated enzymes eluted from the monomeric  
256 avidin beads (**Fig. 3B**). High stability of the active telomerase in all these preps made it feasible  
257 to conduct the time-lapse experiments under different conditions.

258

259 We asked the question of whether the active sites in a dimeric telomerase holoenzyme or in  
260 monomeric enzymes were both active at the same time and if both active, whether the two sites  
261 would both undergo catalysis-dependent loss of activity. We first characterized the basic

262 thermodynamic and kinetic properties of the active sites. Because two different monomers may  
263 be kinetics similar to dimers with two different active sites, our analysis will use dimeric  
264 enzymes as examples and the principles then apply to the two different monomers. A dimeric  
265 enzyme with two types of active sites might be in three distinct conformational states: the  
266 pristine enzyme ( $E_0$ ) with both active sites functional, the once-used enzyme ( $E_1$ ) with one site  
267 functional and the other nonfunctional, and the exhausted enzyme ( $E_2$ ) with no activity. A  
268 monomeric enzyme has one active site in either the active ( $M_1$ ) or the exhausted state ( $M_2$ ).  
269 Quantitative kinetic analysis would be needed in order to characterize enzymes distributed  
270 among these states<sup>47</sup>.

271

272 With saturating concentrations of substrates (200 nM), catalytic activity of the telomerase from  
273 H1299 cell lysates or partially purified in a continuous glycerol gradient was compared with the  
274 enzymes eluted from (TTAGGG)<sub>3</sub>-conjugated beads (as the Elution 1 in **Fig. 1B**). The same  
275 amount (cell equivalency) of enzymes were used for extension reaction, but stopped at different  
276 time points by heat inactivation to halt the reactions and dissociate the products (**Figs 4A, 4B**).  
277 The released products were quantified by ddTRAP and normalized against the total products at  
278 90 minutes. Without exception, the enzymes from different preparations all exhibited a fast and a  
279 slow kinetic component (**Figs 4A-4D**; supplementary **Fig. S7**). The fast one was saturated after  
280 ~5 minutes. The slow one slowly increased without saturation at 90 minutes, but with a longer  
281 time, it did saturate after ~300 minutes (**Figs 4A-B, 4E-F & S7**). The kinetic difference between  
282 the two components is striking (**Figs 4A, 4E**). Both components deviate significantly from what  
283 is expected from enzymes that are continuously active (red dash-lines based on the initial  
284 reaction rates in **Figs 4 & S7**). In accord with the use-dependent loss of activity, the two

285 saturating kinetic components in product accumulation suggest that there are two different types  
286 of active sites that both become inactive after catalysis. As depicted above, the two kinds of  
287 active sites may come from two distinct monomeric holoenzymes or be contained within one  
288 dimeric complex.

289

290 Compared to the two kinetic components of the endogenous telomerase, the telomerase from the  
291 one-step single-turnover affinity purification using the R3-beads exhibited *only the slow*  
292 *component* (**Fig. 4B**). Because the single-turnover affinity purification would remove all  
293 monomeric enzymes (fast or slow), the leftover enzymes must be dimeric (Fig 4B), which has  
294 the same kinetic constant as the slow-component in the mixed enzymes from cell lysate (Fig. 4B  
295 vs 4E). Comparing this result with those in **Figs 1B & 4A**, we deduced that after the first single-  
296 turnover addition of 3-nucleotides, the fast kinetic components (**Fig. 4A**) either dimers in  $E_0$  state  
297 or fast monomers  $fM_1$  and the slow components (monomers in  $sM_1$  and dimers in  $E_1$ ), which  
298 remained bound to the beads or were able to add 3-nt and elute out, were removed such that the  
299 Elution 1 fraction (**Fig. 4B**) was dominated by the dimeric enzymes with slow-acting active sites  
300 ( $E_1$ ). The two kinetic components were different in time domain such that two exponential  
301 components were needed to fit the data (**Figs 4E-F**). As compared in supplementary **Fig. S7**, one  
302 exponential component is not sufficient to fit the data.

303

304 We next evaluated the initial rates of product accumulation by varying the DNA-substrate  
305 concentration while keeping the dNTPs saturated, under which the binding of the DNA substrate  
306 became rate-limiting. The average initial rate, which was represented by the slope within the first

307 five minutes and extrapolated to near  $t = 0$  min (the boundary condition), was obtained for the  
308 fast component as illustrated in **Fig. 4A**. The average initial rate in the first 10 minutes was  
309 obtained for the slow-acting component as showed in **Fig. 4B**. We normalized the initial reaction  
310 rates against the maximal rates at 200 nM substrates and plotted them against substrate  
311 concentration (**Figs 4C & 4D**, respectively). Without calibrating the absolute quantity of the  
312 telomerase, we instead used the same amount of enzyme fractions for the reactions stopped at  
313 different time points and repeated the experiments in triplicates. Because we measured the initial  
314 rates with a trace amount of enzymes and a small fraction of product accumulation, a Michaelis-  
315 Menten equation ( $V_0 / V_{max} = 1 / (1 + [S] / K_m)$ ) could be used to describe the normalized initial  
316 rate as a function of the DNA substrate, yielding  $K_m = 10$  nM and 28 nM for the fast-acting and  
317 slow-acting components, respectively. These are fairly close to what were measured before using  
318 different DNS-substrates<sup>52-54</sup>. The difference in  $K_m$  argued against the hypothesis that the same  
319 active site counts two rounds of reaction before shutting itself off. It further confirmed that the  
320 fast- and slow-acting components co-exist in the heterogeneous holoenzymes. Because of the  
321 slow OFF-rate ( $k_{OFF} < 1/72000$  s<sup>-1</sup>; at the AGGG position)<sup>52</sup>,  $K_m \sim k_{OFF} / k_{ON}$  could provide an  
322 upper-limit for  $k_{ON}$  of  $\sim 5.0 \times 10^2$  M<sup>-1</sup>s<sup>-1</sup>, suggesting that the reaction of the holoenzymes would  
323 be slow if the telomere concentration is at the nM level in cells.

324

### 325 **Two active sites in a dimer bind substrates in a sequential manner and act in tandem**

326 Because our two step R3-binding can separate the dimeric enzymes in E1 state, we next ask if  
327 the two active sites in a dimer can function at the same time. The kinetic differences between the  
328 slow and fast-components could be explained by different Markov models --- a two-step



329 sequential model in a dimer, a parallel model in a dimer or two different monomers ( $fM_1$  and  
330  $sM_1$ ), and a sequential model with a delay in a dimer (**Fig. 4G**). Here the parallel model  
331 accounted for either *two* different types of monomeric enzymes or *one* type of dimeric enzymes  
332 harboring two distinct active sites. Using MATLAB programs to derive numerical solutions to  
333 each model (supplementary information; red-lines in **Fig. 4E-F**), we estimated two kinetic  
334 constants from these models,  $\sim 0.4 \text{ min}^{-1}$  and  $0.01 \text{ min}^{-1}$  for the fast and the slow components,  
335 respectively (**Fig. 4H**). All Markov models fitted the time-lapse data reasonably well. The  
336 sequential model with a delay worked slightly better than the others.

337

338 To experimentally test the sequential or parallel actions of the two active sites in the dimeric  
339 enzymes, we examined whether the two sites interfere with each other during the DNA substrate-  
340 binding step, i.e. whether the DNA substrate binding to the first site affects the binding to the  
341 second one. The parallel model of one dimer or two different monomers would support  
342 simultaneous binding of two substrates to two active sites (**Fig. 4G**). The different monomers  
343 must act in parallel. In contrast, a sequential model of a dimer would indicate that the enzyme  
344 extends one substrate at a time and only after the first site finishes its catalysis can the second  
345 site performs its reaction.

346

347 We would like to test whether the dimers can act as in a sequential model. We used the tethered  
348 recombinant telomerase holoenzymes, which were physically separated from each other by at  
349 least 50 nm on the surfaces of streptavidin-coated beads so that on average, two neighboring  
350 separate enzyme complexes were physically independent of each other (**Fig 5A**). Biotinylated

351 telomerase on the streptavidin-coated beads was first incubated with the TS primers (DNA  
352 substrates) which would be stabilized at the GGG-position and would stay bound when there was  
353 no catalysis<sup>32</sup>. The saturating concentration of TS primers would fill in all accessible active sites  
354 ( $sM_1$ ,  $fM_1$ ,  $E_1$  and  $E_0$ ). After the first round of extension the products were separated from the  
355 tethered enzymes within ~20 minutes, which was much shorter than 10 hours such that only a  
356 very small fraction (<4%) of the bound substrates in the slow-acting sites ( $sM_1$ , or in either  $E_1$  or  
357  $E_0$ ) that were not catalyzing would dissociate. During this round, monomeric  $fM_1$  would all  
358 become inactive, a good fraction (82%) of monomeric  $sM_1$  or dimeric  $E_1$  would remain bound  
359 with the products, and all  $E_0$  dimers would become  $E_1$ . If both active sites of  $E_0$  were bound with  
360 the substrates, then at the end of the first round, all leftover active sites would be occupied by the  
361 DNA-substrates.

362

363 We can test if the above prediction is true by conducting the second round of reactions in two  
364 different conditions. For the second round of the reaction, the enzymes on the beads were split  
365 into two equal aliquots and performed reactions in an extension mixture with or without fresh TS  
366 primers (“ctl + TS” and “-TS” in **Figs 5A & 5B**). If all slow-acting active sites were saturated  
367 during the first round of substrate binding, >96% of bound substrates would not have enough  
368 time to dissociate during the fast separation of tethered enzymes from free TS primers and  
369 products, the second round of extension reaction from the bound-primers should produce  
370 approximately the same amount of products, regardless of whether or not fresh primers were  
371 added. However, our data showed the opposite. In the second round of reaction the tethered  
372 enzymes with no fresh substrates (“-TS”) exhibited a significant drop (~75% less) in extension  
373 products, when compared to the control sample (**Fig. 5B**). The significant reduction (44% of the

374 total activity in the first round) in the yield of products during the second round must have come  
375 from the *lack of bound substrates* in a majority of the slow-acting active sites of the dimeric  
376 enzymes ( $E_0$ ) during the first round of reaction, and fresh substrates were necessary for these  
377 empty sites to perform their reactions. The residual 16% [Extension 2 (-TS)] could come from  
378 the majority (82%) of slow active sites in dimers ( $E_1$ ) or slow monomers ( $sM_1$ ) that were in the  
379 middle of their reactions or from a small fraction of active sites (< 6% based on the extension 3  
380 (+TS) in **Fig. 5B**) that completed their reactions but did not release their products quick enough.

381

382 Our observation was not caused by the degradation of the bound TS primers because we used  
383 DNase/RNase free solutions and nuclease inhibitors in our buffers, and the amount of DNA  
384 substrates overwhelmed the active sites of the telomerase by at least nine orders of magnitude.  
385 Thus, the only sound explanation was that a significant fraction of slow active sites (75% for  
386 Extension 2, equivalent to ~44% of total active sites in Extension 1) were inaccessible to the  
387 substrates during the first round of reaction, and thus were *empty*. Based on the data in Fig. 5B,  
388 we estimated that at the beginning of the first round of reaction, the enzyme mixture contained  
389 approximately 44%  $E_1$  dimers, 36%  $fM_1$  monomers, and 20% ( $sM_1$  monomers +  $E_1$  dimers). In an  
390  $E_0$  dimer, TS primer-binding to its fast-acting site negatively impacts on the binding of a second  
391 primer to the slow active site. This represents a strong negative cooperativity between the two  
392 active sites in the  $E_0$  dimer.

393

394 Because of no physical contact between neighboring telomerase complexes on the streptavidin-  
395 coated beads, the strong negative cooperativity is only possible when the two types of active sites

396 are within a dimeric telomerase holoenzyme, not from two separate enzymes (**Figs 5A-B, 4G**).  
397 Further, negative cooperativity in substrate-binding suggests that a significant fraction (~44%) of  
398  $E_0$  dimers exist in the enzyme mixture separated from cell lysates even though the new  
399 intermediate-resolution cryoEM structure reveals a monomer. The negative-cooperativity also  
400 explains the observation that the two active sites exhibit different affinities to the same substrates  
401 (**Figs 4C-4D**).

402

403 As depicted in **Fig. 4G**, a dimeric enzyme with two different active sites may have three different  
404 states. The dimers in cell lysates thus belong to three subgroups ----  $E_0$ ,  $E_1$  and  $E_2$ . In the first  
405 round of extension, the pristine enzymes ( $E_0$ ) were converted to  $E_1$  (**Fig. 1A**), and a small  
406 fraction of  $E_1$  changed into  $E_2$  (**Figs 1A, 4A & 5A**). In the second round, the leftover  $E_1$  enzymes  
407 became inactive  $E_2$ , explaining why the flow-through fraction, the wash ones, or the Elution 2  
408 fraction in **Fig. 1B** had no activity. A sequential model (with or without a delay) is therefore  
409 supported by experimental data (Fig 5B) and can explain the kinetic property of the dimers (**Fig.**  
410 **4G**). Between the two monomeric forms, the slow  $sM_1$  enzymes behaved the same as the  $E_1$  and  
411 contributed partially to the products seen in Extension 2 (-TS) and the fast  $fM_1$  enzymes (36% in  
412 the mixture) turned into inactive  $M_2$  (**Fig. 5B**). The ratio of monomers vs. dimers estimated from  
413 our results is thus similar to what was derived by single molecular imaging<sup>31</sup>.

414

415 To further test the sequential model for the fraction of dimeric telomerase, we varied the  
416 incubation time for the first extension on the tethered enzymes. For this series of experiments,  
417 the same amounts of enzymes were allowed to extend the TS primers for 30, 90, or 120 min in

418 the first extension, respectively. Afterwards, the enzymes were separated from the products and  
419 subjected to an equal extension time (90 minutes) for the second and the third round. Based on  
420 its time-constant, the fast-acting sites became completely inactive after ~10 minutes (Round 1).  
421 The fixed amount of time in the three rounds within the regime of a sequential models predicted  
422 that the total products from the three rounds would be similar for three groups. Group 1 (30 min  
423 extension in round 1, **Fig. 5C**) had the lowest activity in the first round, but greater activity in  
424 both the second and third rounds (**Fig. 5C**) as compared to group 2 (90 min ext 1) and group 3  
425 (120 min ext 1) samples. The enzymes in group 3 with sufficient time during the first two rounds  
426 showed almost no activity in the third round because of the catalysis-dependent shutoff. The  
427 time-dependent catalysis of the telomerase complex followed the prediction from the models in  
428 Fig. 4G with substantial amounts of dimer enzymes. Because of the processive reaction in each  
429 active site, we name the catalysis-dependent shutoff of human telomerase “*single-run catalysis*”,  
430 instead of single-turnover (**Fig. 4G**).

431

432 A significant fraction (~44%) of functional enzymes in the cell lysates were dimeric  $E_0$ . Our  
433 analysis accounted for the existence of monomeric enzymes, which followed single-exponential  
434 kinetics (**Fig. 4G**). Combination of the sequential model for the dimeric holoenzymes with the  
435 parallel model for two monomeric forms was thus able to fit all experimental data very well  
436 (**Figs 4** and supplementary **Fig. S7**). It is thus not necessary to biochemically purified the  
437 telomerase monomers from the dimers for us to deduce the fundamental property of the enzyme.  
438 A simple assumption of the  $fM_1$  and  $sM_1$  following the kinetics for fast- and slow-acting sites  
439 was sufficient for reaching the biophysical understanding (**Fig. 4H**).

440

441 **Intracellular telomerase-activating factors (iTAFs) turn on inactive telomerases**

442 Allosterically, the inactive enzymes probably reside in a stable conformation that does not switch  
443 back to the active state due to an energy barrier or due to the missing of accessory factors that  
444 might dissociate during the middle of the extension reaction. There are three potential destinies  
445 for inactive enzymes inside a cell: being recycled into the active form, being degraded or being  
446 stored in cells as a reserve. Telomerase is known to be active in dividing cells in every cell cycle.  
447 This led us to the question whether it is possible to turn on the inactive telomerase.

448

449 We first tested the cell lysates from a telomerase-negative cell line, BJ fibroblasts, and used  
450 ddTRAP to quantify the fraction of enzymes that were reactivated (**Fig. 6A**). The tethered  
451 enzymes on the streptavidin-coated beads were made fully inactive after three rounds of  
452 extension reactions (in  $E_2$  or  $M_2$  states in **Fig. 6B**). Afterwards the beads with inactive enzymes  
453 were mixed with the BJ cell lysates and the extension reaction mixture for 2 hours before the  
454 extended products were counted using ddTRAP. To our surprise, the cell lysates from the  
455 telomerase-negative BJ cells were able to reactivate a significant fraction of inactive enzymes (as  
456 exemplified in **Fig. 6B**). As a negative control, the BJ cell lysates had no activity (**Fig. 6B**).  
457 These results clearly demonstrated that the BJ cells contain intracellular telomerase-activating  
458 factors (iTAFs) that can reactivate the inactive holoenzymes ( $E_2$  and  $M_2$ ). The same iTAF  
459 activity was detected in other types of telomerase-negative proliferating cells, such as SAOS-2  
460 and SKLU-1 (**Fig. 6F**).

461

462 When partially purified telomerase holoenzymes were incubated with iTAFs, the time-lapse  
463 experiments showed that the activation by iTAFs increased the amount of the fast-acting sites ( $E_0$   
464 or  $fM_1$ ) by only a small fraction ( $\sim 25\%$ ), but boosted the slow-acting active sites ( $E_1$  or  $sM_1$ )  
465 much more significantly ( $\sim 480\%$ ) (**Fig. 6C vs. 6D**). The control telomerase (**Fig. 6C**) had  
466 roughly equal amount of fast and slow sites. The (re)activated enzymes were dominated by slow-  
467 acting sites ( $E_1$  or  $sM_1$ ), suggesting that the iTAFs preferentially switched the inactive enzymes  
468 into the  $E_1$  or  $sM_1$  states. Furthermore, the fast active sites in the reactivated enzymes displayed a  
469 slightly faster kinetics, which remains comparable to that of the native enzymes. These data  
470 further demonstrate that the two kinetic components reflect the intrinsic properties of the native,  
471 functional telomerase holoenzymes (supplementary **Fig. S7**).

472

473 The iTAFs are proteineous components. We were able to separate iTAFs from the telomerase  
474 fractions in a glycerol gradient. The iTAFs heated in a boiling temperature lost their activity in  
475 reactivating the inactive enzymes (**Fig. 6E**). DNase treatment of iTAFs had almost no effect on  
476 their activity (**Fig. 6E**). When the cell lysates were fractionated and eluted in a Superdex 200  
477 column, the iTAFs were found to be equivalent to an  $\sim 150$  kDa globular protein (supplementary  
478 **Fig. S8**). Further experiments are needed to identify the iTAFs and characterize their activity on  
479 the holoenzymes.

480

## 481 **DISCUSSIONS**

482

## 483 **A kinetic model for catalysis-dependent inactivation and iTAF-mediated reactivation**

484 Our results show that in the telomerase mixture of both dimers and monomers inside a human  
485 cell, a dimeric telomerase containing both fast- and slow-acting active sites and there are two  
486 isoforms of monomeric enzymes harboring similar fast and slow active sites, respectively (**Figs**  
487 **4A-D**). The two types of active sites exhibit different affinities for the DNA substrates. The  
488 negative cooperativity between them happens within a dimeric enzyme and makes the slow site  
489 inaccessible to substrates when the fast site is in catalysis. A dimeric  $E_0$  enzyme may undergo a  
490 symmetry breakdown when one of its active sites is bound with a DNA substrate, and its two  
491 sites act in tandem. The monomers do not have negative-interactions between them (**Fig. 5B**).  
492 More importantly, both types of active sites perform single-run catalysis (**Fig. 7A**), and iTAFs  
493 can turn the inactive enzymes ( $E_2$  or  $M_2$ ) into different active states (**Fig. 7B**). Our results can be  
494 incorporated into a kinetic model in **Fig. 7A**, where one active site goes through one round of  
495 processive extension reaction and becomes inactive after it falls off the product (**Figs 1A-B**).  
496 The inactive site can be turned back on (step IV; recycle). The switching of the enzymes between  
497 active and inactive states is further diagramed in **Fig. 7B**. Both the endogenous telomerase  
498 holoenzymes and the recombinant ones exhibited similar kinetic property under different  
499 conditions. We therefore propose that the use-dependent loss of activity and the iTAF-dependent  
500 gain of activity represent fundamental properties of human telomerase and provide an intrinsic  
501 ON-OFF control of its activity in human cells.

502

503 The sequential action of the two sites in a dimeric telomerase (**Fig. 7B**) suggests that a dimeric  
504 enzyme does not act on two chromosomal ends (say homologous chromosomes) at the same time



505 <sup>43, 48, 55</sup>. Two monomers can act on two telomeres simultaneously. The total time for complete  
506 exhaustion of telomerase activity would be ~300 minutes, shorter than the average duration of  
507 the S-phase of human cell cycles (6-8 hours). For quick dividing cells, the S-phase might be < 30  
508 minutes such that only the fast-active sites ( $E_0$  and  $fM_1$ ) are suitable for fast chromosomal  
509 replication. Under such conditions, extra copies of mature telomerase holoenzymes would be  
510 needed to avoid critically short telomeres. A combination of fast and slow active sites in dimers  
511 and monomers would be sufficient to match the time needed for telomerase to finish its catalysis  
512 with the duration of the S-phase so that the telomerase activity can be maximally utilized. This  
513 might be one of the reasons why the telomerase holoenzymes have two types of active sites with  
514 contrastingly different kinetics. This scenario may still allow the reactivation of fast-acting sites  
515 to perform extra rounds of reactions when cells need them to ensure timely completion of the S-  
516 phase. This mechanism indicates a possible role of the iTAFs in regulating the S/G2 transition.

517

### 518 **Single-run catalysis of human telomerase**

519 When counting the extension products by ddTRAP with single digit accuracy, we could avoid  
520 complications from the average length of extension products, the differences in catalysis rates,  
521 and the possible delay between the moment the fast site in a dimer is turned off and the time  
522 point when the slow site becomes accessible to a new substrate (**Fig. 4G**). Using the substrate  
523 pull-down to select only active enzymes in the single-turnover setting (**Figs 1A-1B**), we avoided  
524 the often observed mismatching between a larger amount of enzymes (or hTERT) and a smaller  
525 number of extension products in the enzyme assays <sup>34</sup>, which indicates a significant fraction of  
526 inactive enzymes. The similar distribution of the products of different lengths in the Input 1 and

527 that in the Elution 1 ( $E_1$  or slow  $M_1$ ) in **Fig. 1B** from the endogenous telomerase suggests that the  
528 processive additions of repeats to substrates are similar between the slow and the fast active sites  
529 (**Fig. 7A**). The main differences between the fast and slow-acting sites are thus due to other  
530 factors, such as accessibility to substrates, initiation of the successful extension reaction, pause  
531 duration after the complete extension of each repeat, etc. Single molecule enzymology would be  
532 suitable for determining the detailed differences between these two active sites <sup>44, 56, 57</sup>, even  
533 though the slow sites might be difficult to study and the dimeric enzymes might fall apart *in vitro*  
534 and the enzymes remain heterogeneous in stoichiometry and conformation.

535

536 The single-run catalysis may not be limited only to human telomerase <sup>58, 59</sup> because the  
537 monomeric enzymes seen in other organisms may have two different isoforms. It is tempting to  
538 speculate a similar mechanism in yeast and Tetrahymena even though they vary in TERT and TR  
539 size and in complex stoichiometry. The single-run catalysis also occurs to other  
540 ribonucleoprotein (RNP) complex, for example, CRISPR/cas9 <sup>60</sup>, suggesting a more universal  
541 mechanism among RNP enzymes. A generic mechanism of catalysis-dependent turn-off and  
542 iTAF-dependent turn-on of the telomerase holoenzymes in other species will likely reveal a more  
543 general role of the single-run catalysis in achieving tight regulation of the telomerase activity.

544

#### 545 **The iTAFs differ from other proteineous factors that regulate telomerase activity**

546 The iTAFs are proteineous factors that can be fractionated. They are the first group of factors  
547 that directly control the recycling of human telomerase, and are mechanistically different from  
548 the recruitment factors in the shelterin complex, the hTR binding factors as well as the factors

549 involved in the assembly of nascent active enzymes <sup>61</sup>. It is still early to say whether they  
550 function at the same location and / or time as the recruitment and/or activation of the telomerase  
551 at the shelterin complex <sup>61,62</sup>. Nor are we able to explain why iTAFs are found in telomerase-free  
552 cells. Future study will be needed to identify the iTAFs and verify their functions in both  
553 telomerase-positive and –negative cells.

554

555 With the slow kinetics and the stability of the telomerase holoenzymes within 5-8 hours at room  
556 temperature, we have not been able to determine how many times each telomerase can be turned  
557 off and turned back on before its breakdown. The high stability of a holoenzyme in the nuclear  
558 environment may allow multiple OFF-ON cycles before it becomes defective and is marked for  
559 degradation. More broadly, whether the iTAFs function in controlling cell cycle and what other  
560 functions they might have in cell proliferation and cell ageing are interesting questions for the  
561 future.

562

### 563 **Single-run catalysis as a built-in brake for human telomerase**

564 Similar to single-turnover enzymes, catalysis-dependent inactivation of human telomerase offers  
565 an exquisite regulatory mechanism. There are at least two layers of control. The first is that the  
566 fast-acting sites are quickly exhausted, ~40 times faster than the slow sites. The second is that the  
567 iTAFs may be regulated through different pathways.

568

569 The single-run catalysis explains the need for telomere extension to happen in focused areas in  
570 the nucleus. With each active site acting once on one telomere in a co-replicative manner in the  
571 S-phase, ~92 active sites are needed, that is equivalent to 46 copies of dimeric telomerase  
572 holoenzymes in  $E_0$  state to satisfy the need of extending all telomeres. If these enzymes are  
573 randomly distributed in a nucleus of ~5 microns in diameter, the average concentration of the  
574 active sites is ~ 0.1 - 0.2 nM, two orders of magnitude lower than the measured  $K_m$  for these  
575 sites (**Figs 4C-D**). To solve this mass-action problem, the telomerase molecules may be  
576 concentrated in a small area (< 0.5 microns) such that their local concentration would be ~200  
577 nM, sufficient to support productive collisions between telomerase active sites and individual  
578 telomeres. Similarly, the telomeres of different chromosomes may be looped from individual  
579 chromosomal territories into the telomerase-concentrated regions, the telomere processing  
580 centers, so that the local concentration of the substrates (uncapped telomeres) also can approach  
581 ~200 nM, which would be sufficient for ensuring a sizeable volume of extension reactions within  
582 a short period of time.

583

584 In conclusion, the native human telomerase has two kinetically distinct types of catalytic sites  
585 that manifest varying affinities for the telomeric substrates. The two sites in dimeric enzymes  
586 show negative cooperativity and act in tandem by sequentially becoming accessible to the DNA  
587 substrates. The active sites in monomeric enzymes function independently. Both types of active  
588 sites function as a single-run enzyme because they undergo catalysis-dependent shutoff. Inactive  
589 enzymes can be reactivated by iTAFs from certain cells. Identification of the iTAFs and their  
590 roles in regulating telomerase activity await future studies.

591

592

593 **Acknowledgements:**

594 The authors are indebted to members of the Jiang laboratory and those of the Shay/Wright  
595 laboratory. The results in the manuscript represent part of the PhD dissertation work of M.E.S.,  
596 which was submitted to the UT Southwestern and University of Texas at Arlington in August of  
597 year 2016. Three members of the thesis committee, Drs. Hamid Mirazei, Robert Eberhart and  
598 Michael Cho, provided insightful advice and comments. Drs Sixue Chen and Jin Koh in the  
599 Proteomics Core at the Interdisciplinary Center of Biotechnology Research (ICBR) of UF  
600 offered technical support. This work was mainly supported by CPRIT (RP120474 to Q.-X.J.),  
601 and partially by NIH (R01GM111367 & R01GM093271 to Q.-X.J.), CF Foundation  
602 (JIANG15G0 to Q.-X.J), Welch Foundation (I-1684 to Q.-X.J.) and the startup funds (to Q.-X.J)  
603 from UF. Some experiments reported here were performed in a laboratory constructed with  
604 support from NIH (grant # C06RR30414 with Dr. Jerry Shay as the PI). A.T.L. was funded by a  
605 K99/R00 Pathway to Independence award from NCI (grant number KCA197672A).

606

607 **Conflict of interest:** The authors declare no conflict of interest.

608

609

610 **MATERIALS AND METHODS**

611 Cells used for preparing active telomerases were either H1299 lung adenocarcinoma cells or  
612 super H1299 overexpressing both hTR and N-terminally biotinylated hTERT. BJ human  
613 fibroblasts and other cells were all prepared using proper procedures. Details are in the  
614 supplementary information.

615

616 RT-qPCR (reverse-transcribed quantitative polymerase chain reaction) of hTR was performed by  
617 RNA purification, reverse transcription to produce cDNA, and qPCR using proper primers  
618 against hTR cDNAs.

619

620 Gel-based TRAP assay was performed as described before <sup>63</sup>. Digital droplet PCR (ddPCR)-  
621 based TRAP assay (ddTRAP) quantified the individual extension products by running ddPCR  
622 reactions in individual droplets containing either one or none product, and detecting the positive  
623 ones based on fluorescence. Detailed procedure can be found in Ludlow et al. <sup>47</sup>. ddTRAP counts  
624 the individual extension products in the range of 0-15,000 with high accuracy and  
625 reproducibility.

626

627 SDS-PAGE analysis and western blot detection of protein components were performed based on  
628 published procedures <sup>64</sup>.

629

630 Partial purification of recombinant telomerase was done in four steps. 200 -500 million super  
631 H1299 cells were pooled together, and lysed in a 1.5% CHAPS buffer. The lysate was cleared by  
632 centrifugation and then fractionated in a continuous glycerol gradient. The active fractions were  
633 pooled together and incubated with monomeric avidin beads (Pierce). After the beads were  
634 washed with a buffer, the active enzymes were eluted with 2.0 mM D-biotin. The active fractions  
635 were pooled together and incubated with SPFF beads (GE Health Science) and eluted with 0.2 -  
636 1.0 M NaCl. The eluted enzymes were further fractionated by size-exclusion chromatography in  
637 a Superose 6 column (SEC).

638

639 5'-biotinylated telomeric repeats [(TTAGGG)<sub>3</sub>; R3] were loaded to streptavidin-coated Dyna-  
640 beads. After complete wash to remove free R3, the R3-conjugated beads was used for single-  
641 step pull-down of human telomerase holoenzymes as described before<sup>32</sup>. dATP/dTTP were used  
642 to elute the bound enzymes from the beads. Apyrase treatment was introduced to remove the  
643 nucleotides when two such pull-down steps were performed in tandem.

644

645 Streptavidin-coated magnetic Dyna-beads (MyOne T1, Invitrogen) were used to present the  
646 biotinylated telomerase holoenzymes for multiple rounds of extension reactions. Based on the  
647 surface area of each bead and the amount of streptavidin molecules used for cross-linking  
648 reaction, the average distance between neighboring streptavidin molecules would be at least 50  
649 nm. A magnet was used to achieve quick separation of the tethered enzymes and the reaction  
650 products in less than 3 minutes. Similarly, protein A/G-coated magnetic beads were used to

651 present anti-myc antibodies, which can recognize the myc-tags introduced to the N-terminus of  
652 the recombinant hTERT.

653

654 Partial purification of intracellular telomerase-activating factors (iTAFs) from cell lysates  
655 followed a four-step procedure. After cell lysis, the cleared lysates were fractionated in a  
656 continuous glycerol gradient. The fractions containing iTAF activity were pooled and  
657 concentrated before being run in a Superdex 200 gel-filtration column. The active fractions from  
658 size-exclusion were loaded into a Mono-S column or SPFF for further purification. The active  
659 fractions were tested and subjected to further kinetic analysis.

660

661 The on-line supplementary information contains more details for each step.

662

## 663 **References**

- 664 1. Blackburn, E.H. Telomeres and telomerase: the means to the end (Nobel lecture). *Angew Chem*  
665 *Int Ed Engl* **49**, 7405-7421 (2010).
- 666 2. Blackburn, E.H. Telomeres and telomerase. *Keio J Med* **49**, 59-65 (2000).
- 667 3. de Lange, T. How telomeres solve the end-protection problem. *Science* **326**, 948-952 (2009).
- 668 4. Ouellette, M.M. et al. Subsenescent telomere lengths in fibroblasts immortalized by limiting  
669 amounts of telomerase. *J Biol Chem* **275**, 10072-10076 (2000).
- 670 5. Hemann, M.T., Strong, M.A., Hao, L.Y. & Greider, C.W. The shortest telomere, not average  
671 telomere length, is critical for cell viability and chromosome stability. *Cell* **107**, 67-77 (2001).
- 672 6. Marcand, S., Gilson, E. & Shore, D. A protein-counting mechanism for telomere length regulation  
673 in yeast. *Science* **275**, 986-990 (1997).
- 674 7. Steinert, S., Shay, J.W. & Wright, W.E. Transient expression of human telomerase extends the  
675 life span of normal human fibroblasts. *Biochem Biophys Res Commun* **273**, 1095-1098 (2000).
- 676 8. Zhu, L. et al. Telomere length regulation in mice is linked to a novel chromosome locus. *Proc*  
677 *Natl Acad Sci U S A* **95**, 8648-8653 (1998).
- 678 9. Zhao, Y. et al. Telomere extension occurs at most chromosome ends and is uncoupled from fill-  
679 in in human cancer cells. *Cell* **138**, 463-475 (2009).



- 680 10. Palm, W. & de Lange, T. How shelterin protects mammalian telomeres. *Annu Rev Genet* **42**, 301-  
681 334 (2008).
- 682 11. de Lange, T. Shelterin: the protein complex that shapes and safeguards human telomeres. *Genes*  
683 *Dev* **19**, 2100-2110 (2005).
- 684 12. Blackburn, E.H. & Collins, K. Telomerase: An RNP Enzyme Synthesizes DNA. *Cold Spring Harb*  
685 *Perspect Biol* (2010).
- 686 13. Hsu, M. et al. Telomerase core components protect *Candida* telomeres from aberrant overhang  
687 accumulation. *Proc Natl Acad Sci U S A* **104**, 11682-11687 (2007).
- 688 14. Blackburn, E.H., Greider, C.W. & Szostak, J.W. Telomeres and telomerase: the path from maize,  
689 *Tetrahymena* and yeast to human cancer and aging. *Nat Med* **12**, 1133-1138 (2006).
- 690 15. Greider, C.W. Telomerase RNA levels limit the telomere length equilibrium. *Cold Spring Harb*  
691 *Symp Quant Biol* **71**, 225-229 (2006).
- 692 16. Smogorzewska, A. & de Lange, T. Regulation of telomerase by telomeric proteins. *Annu Rev*  
693 *Biochem* **73**, 177-208 (2004).
- 694 17. Cech, T.R. Beginning to understand the end of the chromosome. *Cell* **116**, 273-279 (2004).
- 695 18. Lei, M., Podell, E.R., Baumann, P. & Cech, T.R. DNA self-recognition in the structure of Pot1  
696 bound to telomeric single-stranded DNA. *Nature* **426**, 198-203 (2003).
- 697 19. Townsley, D.M. et al. Danazol Treatment for Telomere Diseases. *N Engl J Med* **374**, 1922-1931  
698 (2016).
- 699 20. Marian, C.O. et al. The telomerase antagonist, imetelstat, efficiently targets glioblastoma tumor-  
700 initiating cells leading to decreased proliferation and tumor growth. *Clin Cancer Res* **16**, 154-163  
701 (2010).
- 702 21. Mender, I., Gryaznov, S., Dikmen, Z.G., Wright, W.E. & Shay, J.W. Induction of telomere  
703 dysfunction mediated by the telomerase substrate precursor 6-thio-2'-deoxyguanosine. *Cancer*  
704 *Discov* **5**, 82-95 (2015).
- 705 22. Morrish, T.A. & Greider, C.W. Short telomeres initiate telomere recombination in primary and  
706 tumor cells. *PLoS Genet* **5**, e1000357 (2009).
- 707 23. Corey, D.R. Telomeres and telomerase: from discovery to clinical trials. *Chem Biol* **16**, 1219-1223  
708 (2009).
- 709 24. Armanios, M. et al. Short telomeres are sufficient to cause the degenerative defects associated  
710 with aging. *Am J Hum Genet* **85**, 823-832 (2009).
- 711 25. Boukamp, P. & Mirancea, N. Telomeres rather than telomerase a key target for anti-cancer  
712 therapy? *Exp Dermatol* **16**, 71-79 (2007).
- 713 26. Blackburn, E.H. Telomerase and Cancer: Kirk A. Landon--AACR prize for basic cancer research  
714 lecture. *Mol Cancer Res* **3**, 477-482 (2005).
- 715 27. Folini, M., Venturini, L., Cimino-Reale, G. & Zaffaroni, N. Telomeres as targets for anticancer  
716 therapies. *Expert Opin Ther Targets* (2011).
- 717 28. Montanaro, L. Dyskerin and cancer: more than telomerase. The defect in mRNA translation  
718 helps in explaining how a proliferative defect leads to cancer. *J Pathol* **222**, 345-349 (2010).
- 719 29. Trahan, C. & Dragon, F. Dyskeratosis congenita mutations in the H/ACA domain of human  
720 telomerase RNA affect its assembly into a pre-RNP. *RNA* **15**, 235-243 (2009).
- 721 30. Venteicher, A.S. et al. A human telomerase holoenzyme protein required for Cajal body  
722 localization and telomere synthesis. *Science* **323**, 644-648 (2009).
- 723 31. Wu, R.A., Dagdas, Y.S., Yilmaz, S.T., Yildiz, A. & Collins, K. Single-molecule imaging of telomerase  
724 reverse transcriptase in human telomerase holoenzyme and minimal RNP complexes. *Elife* **4**  
725 (2015).
- 726 32. Cohen, S.B. et al. Protein composition of catalytically active human telomerase from immortal  
727 cells. *Science* **315**, 1850-1853 (2007).

- 728 33. Venteicher, A.S., Meng, Z., Mason, P.J., Veenstra, T.D. & Artandi, S.E. Identification of ATPases  
729 pontin and reptin as telomerase components essential for holoenzyme assembly. *Cell* **132**, 945-  
730 957 (2008).
- 731 34. Nguyen, T.H.D. et al. Cryo-EM structure of substrate-bound human telomerase holoenzyme.  
732 *Nature* **557**, 190-195 (2018).
- 733 35. Alves, D. et al. Single-molecule analysis of human telomerase monomer. *Nat Chem Biol* **4**, 287-  
734 289 (2008).
- 735 36. Mozdy, A.D. & Cech, T.R. Low abundance of telomerase in yeast: implications for telomerase  
736 haploinsufficiency. *RNA* **12**, 1721-1737 (2006).
- 737 37. Blackburn, E.H. Telomere states and cell fates. *Nature* **408**, 53-56 (2000).
- 738 38. Blackburn, E.H. Switching and signaling at the telomere. *Cell* **106**, 661-673 (2001).
- 739 39. Bianchi, A. & Shore, D. How telomerase reaches its end: mechanism of telomerase regulation by  
740 the telomeric complex. *Mol Cell* **31**, 153-165 (2008).
- 741 40. Shore, D. & Bianchi, A. Telomere length regulation: coupling DNA end processing to feedback  
742 regulation of telomerase. *EMBO J* **28**, 2309-2322 (2009).
- 743 41. Forstemann, K. & Lingner, J. Telomerase limits the extent of base pairing between template RNA  
744 and telomeric DNA. *EMBO Rep* **6**, 361-366 (2005).
- 745 42. Jiang, J. et al. The architecture of Tetrahymena telomerase holoenzyme. *Nature* **496**, 187-192  
746 (2013).
- 747 43. Sauerwald, A. et al. Structure of active dimeric human telomerase. *Nat Struct Mol Biol* **20**, 454-  
748 460 (2013).
- 749 44. Parks, J.W. & Stone, M.D. Single-Molecule Studies of Telomeres and Telomerase. *Annu Rev*  
750 *Biophys* (2017).
- 751 45. Maine, G.N. et al. A bimolecular affinity purification method under denaturing conditions for  
752 rapid isolation of a ubiquitinated protein for mass spectrometry analysis. *Nat Protoc* **5**, 1447-  
753 1459 (2010).
- 754 46. Skvortsov, D.A., Zvereva, M.E., Shpanchenko, O.V. & Dontsova, O.A. Assays for detection of  
755 telomerase activity. *Acta Naturae* **3**, 48-68 (2011).
- 756 47. Ludlow, A.T. et al. Quantitative telomerase enzyme activity determination using droplet digital  
757 PCR with single cell resolution. *Nucleic Acids Res* **42**, e104 (2014).
- 758 48. Wenz, C. et al. Human telomerase contains two cooperating telomerase RNA molecules. *EMBO J*  
759 **20**, 3526-3534 (2001).
- 760 49. Beattie, T.L., Zhou, W., Robinson, M.O. & Harrington, L. Reconstitution of human telomerase  
761 activity in vitro. *Curr Biol* **8**, 177-180 (1998).
- 762 50. Gardano, L., Holland, L., Oulton, R., Le Bihan, T. & Harrington, L. Native gel electrophoresis of  
763 human telomerase distinguishes active complexes with or without dyskerin. *Nucleic Acids Res*  
764 **40**, e36 (2012).
- 765 51. Zhang, J. & Hwang, T.C. Electrostatic tuning of the pre- and post-hydrolytic open states in CFTR. *J*  
766 *Gen Physiol* **149**, 355-372 (2017).
- 767 52. Wallweber, G., Gryaznov, S., Pongracz, K. & Pruzan, R. Interaction of human telomerase with its  
768 primer substrate. *Biochemistry* **42**, 589-600 (2003).
- 769 53. Pongracz, K. et al. Novel short oligonucleotide conjugates as inhibitors of human telomerase.  
770 *Nucleosides Nucleotides Nucleic Acids* **22**, 1627-1629 (2003).
- 771 54. Jurczyk, J. et al. Direct involvement of the TEN domain at the active site of human telomerase.  
772 *Nucleic Acids Res* **39**, 1774-1788 (2011).
- 773 55. Sandin, S. & Rhodes, D. Telomerase structure. *Curr Opin Struct Biol* **25**, 104-110 (2014).

- 774 56. Holmstrom, E.D. & Nesbitt, D.J. Single-molecule fluorescence resonance energy transfer studies  
775 of the human telomerase RNA pseudoknot: temperature-/urea-dependent folding kinetics and  
776 thermodynamics. *J Phys Chem B* **118**, 3853-3863 (2014).
- 777 57. Hengesbach, M., Kim, N.K., Feigon, J. & Stone, M.D. Single-molecule FRET reveals the folding  
778 dynamics of the human telomerase RNA pseudoknot domain. *Angew Chem Int Ed Engl* **51**, 5876-  
779 5879 (2012).
- 780 58. Prescott, J. & Blackburn, E.H. Functionally interacting telomerase RNAs in the yeast telomerase  
781 complex. *Genes Dev* **11**, 2790-2800 (1997).
- 782 59. Wu, R.A., Upton, H.E., Vogan, J.M. & Collins, K. Telomerase Mechanism of Telomere Synthesis.  
783 *Annu Rev Biochem* (2017).
- 784 60. Sternberg, S.H., Redding, S., Jinek, M., Greene, E.C. & Doudna, J.A. DNA interrogation by the  
785 CRISPR RNA-guided endonuclease Cas9. *Nature* **507**, 62-67 (2014).
- 786 61. Armstrong, C.A. & Tomita, K. Fundamental mechanisms of telomerase action in yeasts and  
787 mammals: understanding telomeres and telomerase in cancer cells. *Open Biol* **7** (2017).
- 788 62. Armstrong, C.A., Pearson, S.R., Amelina, H., Moiseeva, V. & Tomita, K. Telomerase activation  
789 after recruitment in fission yeast. *Curr Biol* **24**, 2006-2011 (2014).
- 790 63. Herbert, B.S., Hochreiter, A.E., Wright, W.E. & Shay, J.W. Nonradioactive detection of  
791 telomerase activity using the telomeric repeat amplification protocol. *Nat Protoc* **1**, 1583-1590  
792 (2006).
- 793 64. Jiang, Q.X., Thrower, E.C., Chester, D.W., Ehrlich, B.E. & Sigworth, F.J. Three-dimensional  
794 structure of the type 1 inositol 1,4,5-trisphosphate receptor at 24 Å resolution. *EMBO J* **21**,  
795 3575-3581 (2002).

796

797

798 **Figures and figure legends:**

799

800 **Figure 1: Catalysis dependent loss of telomerase activity.**

801 **(A)** Schematic representation of two repetitive cycles of affinity-based pull-down and elution  
802 from R3 telomeric substrates in order to purify endogenous telomerase from H1299 cells. Fresh  
803 beads and oligos were used for the second round. dATP and dTTP were inactivated by apyrase  
804 enzyme in order for eluted telomerase to bind to fresh beads. **(B)** Gel-based TRAP assay of  
805 samples from the telomerase going through double affinity pull-down. Samples were loaded  
806 according to cell equivalence. Cell equivalence is labeled separately (50, 500, 5000 etc.). The  
807 bottom bands (IC) represent the internal PCR control, iTAS. H1299 control samples on far left  
808 represent total activity from cell lysate. **(C)** Schematic representation of the extension assay of  
809 tethered telomerase through the biotinylated hTERT. After every reaction cycle, extension  
810 products were separated from the beads (and the enzymes) and quantified using the ddTRAP  
811 assay. **(D)** ddTRAP assays of the tethered telomerase. Ext 1 is the first reaction. The enzymes  
812 were washed twice before the second reaction (Ext 2). Two more washes before the third  
813 reaction (Ext 3). “Ext 1\*” denotes the control sample with the delayed extension reaction (after  
814 being kept for 4 hours at room temperature before substrates were presented to it). Error bars:  
815 *s.d.* (n=3).

816

A

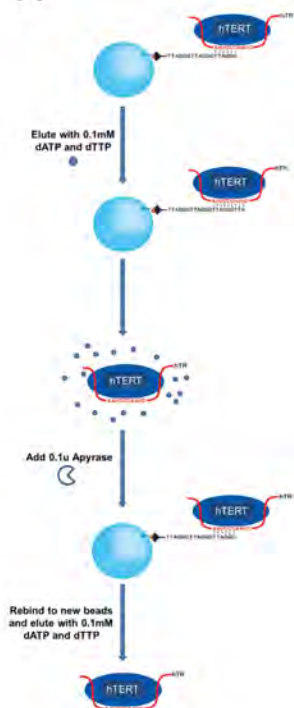

B

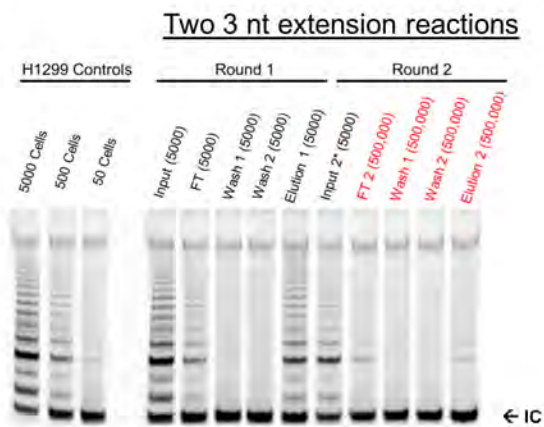

C

Tethered Telomerase Extension Assay

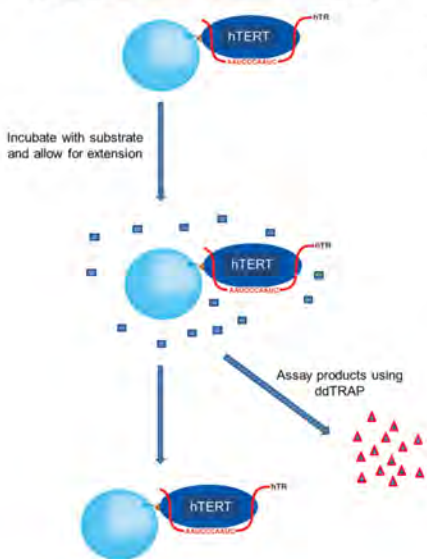

D

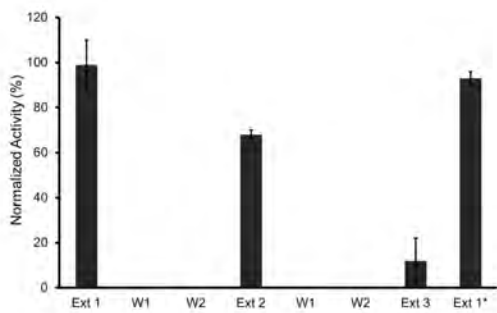

817 **Figure 2: Activity loss of telomerase was not due to enzyme instability, protein**  
818 **degradation, product inhibition or loss of hTR from complex. (A)** Partially purified  
819 telomerase (at different stages indicated by colored bars) retained most activity over 3 days at 4°  
820 C as quantified by ddTRAP activity assay. **(B)** Partially purified telomerase enzyme over 5 hrs at  
821 room temperature, RT, as quantified by ddTRAP activity assay. **(C)** Western blot of hTERT  
822 showing telomerase stability throughout the full cycle of the extension assay of the tethered  
823 telomerase (nearly 5 hours at RT). **(D)** No product inhibition of telomerase activity. After one  
824 extension reaction for 120 minutes, the enzyme was separated from the reaction mixture  
825 containing the extension products. Fresh telomerase (equal amount) was added to the same  
826 reaction mixture. After another 120 min of extension, the products (from two tandem reactions)  
827 were quantified with ddTRAP activity assay (right), roughly twice of the control (left) from the  
828 first reaction. **(E)** Schematic representation of modified tethered telomerase extension assay. In  
829 this assay, ddPCR was used to quantify the hTR content in the products to determine whether  
830 hTR dissociated from the telomerase complex. **(F)** ddPCR quantification of hTR during multiple  
831 rounds of extension reactions (Ext 1 - 3) . >95% of hTRs remained bound to the tethered  
832 enzymes.

833

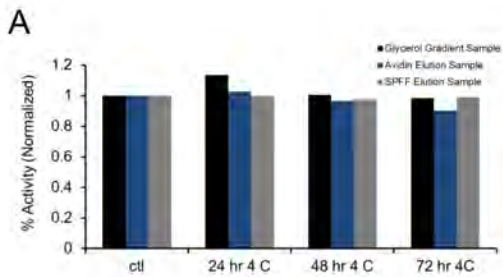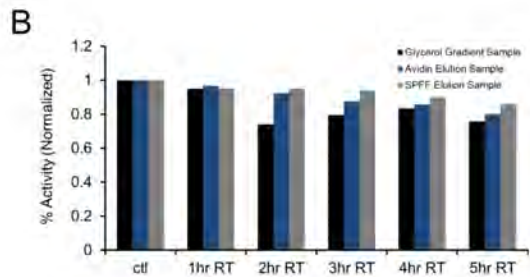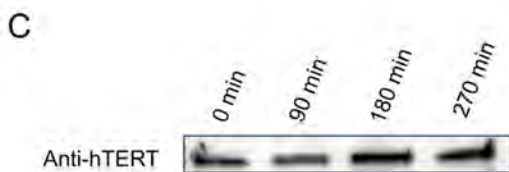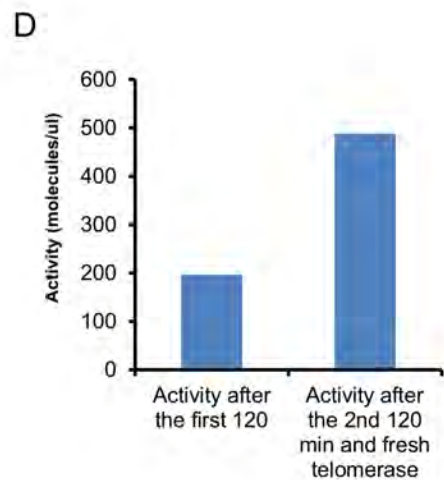

**E**

Modified Tethered Telomerase Extension Assay

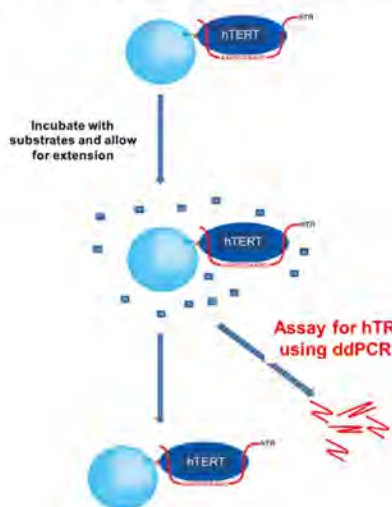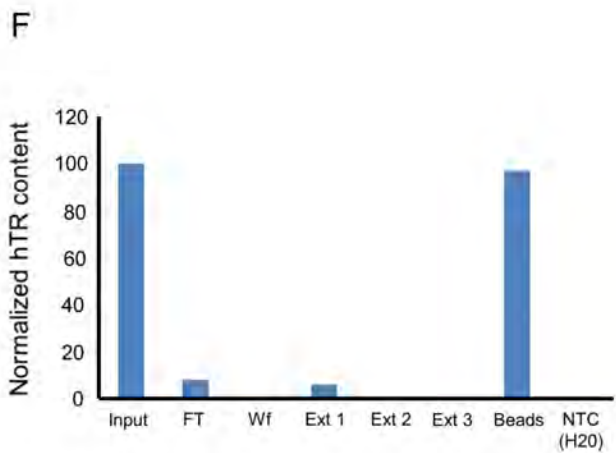

834 **Figure 3: Recombinant telomerase complexes from super H1299 cells have a major fraction**  
835 **of dimers.** Molecular weight marker thyroglobulin (~669 kDa) was run on a 10-30% glycerol  
836 gradient in parallel with recombinant telomerase. **(A)** Coomassie-stained SDS-PAGE assay of  
837 thyroglobulin in all eleven gradient fractions (top F1 to bottom F11). Red box marks the  
838 fractions where telomerase activity was detected. **(B)** Western blot (anti-hTERT) of gradient  
839 fractions shows that the recombinant hTERT (red arrow) is primarily in F8-F11. The  
840 holoenzyme is thus slightly heavier than 669 kDa. **(C)** Recombinant telomerase run through a  
841 Superpose 6 column. ddTRAP assay of the eluted fractions is plotted against fraction # (1 ml  
842 each). Red box indicated the major activity containing fractions. Thyroglobulin run on the same  
843 column eluted with its peak in fraction S14-S15, suggesting that the recombinant telomerase  
844 holoenzyme complex be heavier than 669 kDa. **(D)** Gel-based TRAP assay on gradient fractions.  
845 Lysates of super H1299 fractioned in the glycerol gradient were assayed. Majority of the activity  
846 was found in fractions 8-11.

847



A

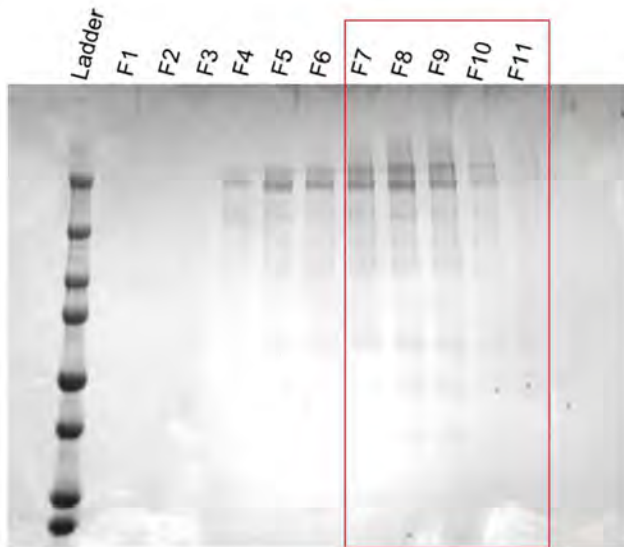

B

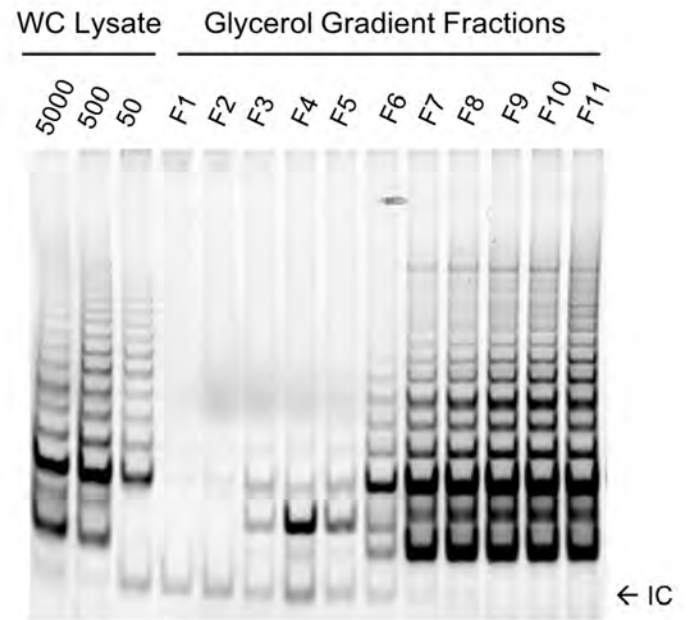

C

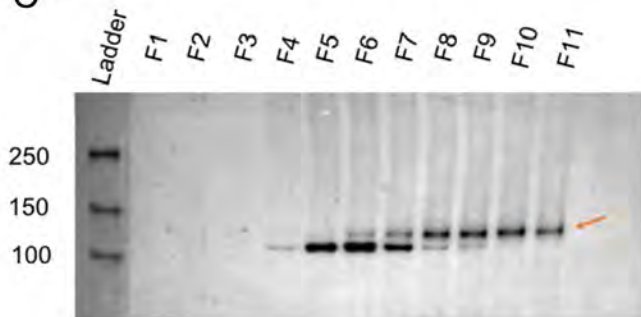

D

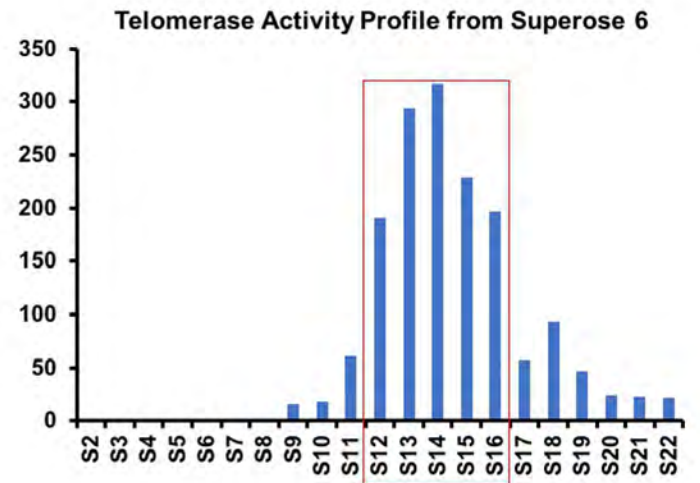

848 **Figure 4: Two distinct active sites in human telomerase.**

849 **(A)** Time course for endogenous telomerase before one-step pull-down purification as in **Fig 1B**.  
850 Telomerase cartoons indicate three populations within the sample. Yellow star indicates a “once  
851 used” enzyme. The enzyme without a star represents either a “pristine”  $E_0$  dimer or an  $M_1$   
852 monomer. The red dashed lines represent the amount of products if the active sites remained  
853 continuously active. **(B)** Time-course of endogenous telomerase after one-step pull-down  
854 purification (Elution 1). The telomerase cartoons indicated a “once-used”  $E_1$  dimer and slow  $M_1$   
855 monomer, respectively. The red dashed line represents the amount of products if the active sites  
856 remained continuously active. **(C)** Michaelis-Menten plot for fast-acting components of the  
857 endogenous telomerase in panel **A**. Fitting of the data found  $K_m \sim 10$  nM. **(D)** Michaelis-Menten  
858 plot for endogenous telomerase used in panel **B**.  $K_m \sim 28$  nM. **(E)** Time course for ddTRAP  
859 assay of partially purified endogenous telomerase activity in fractions from glycerol gradient.  
860 Error bars: *s.d.* (n=3). The red dashed lines represent the amount of products if the active sites  
861 remained continuously active. **(F)** Time course for ddTRAP assay of partially purified  
862 recombinant telomerase in glycerol gradient fractions. Error bars: *s.d.* (n=3). The dashed line  
863 represents the amount of products if the active sites remained continuously active. **(G)** Parallel  
864 Markov models for monomeric telomerase by switching fast- ( $fM_1$ ) and slow-acting ( $sM_1$ )  
865 monomers into inactive monomers ( $M_2$ ) and three different kinetic models for a telomerase  
866 dimer: Sequential with delay, Sequential and Parallel. **(H)** “Fast” and “slow” kinetic constants  
867 ( $k_1$  and  $k_2$ ) from data in panels **E** and **F** after two-exponential fitting.

868

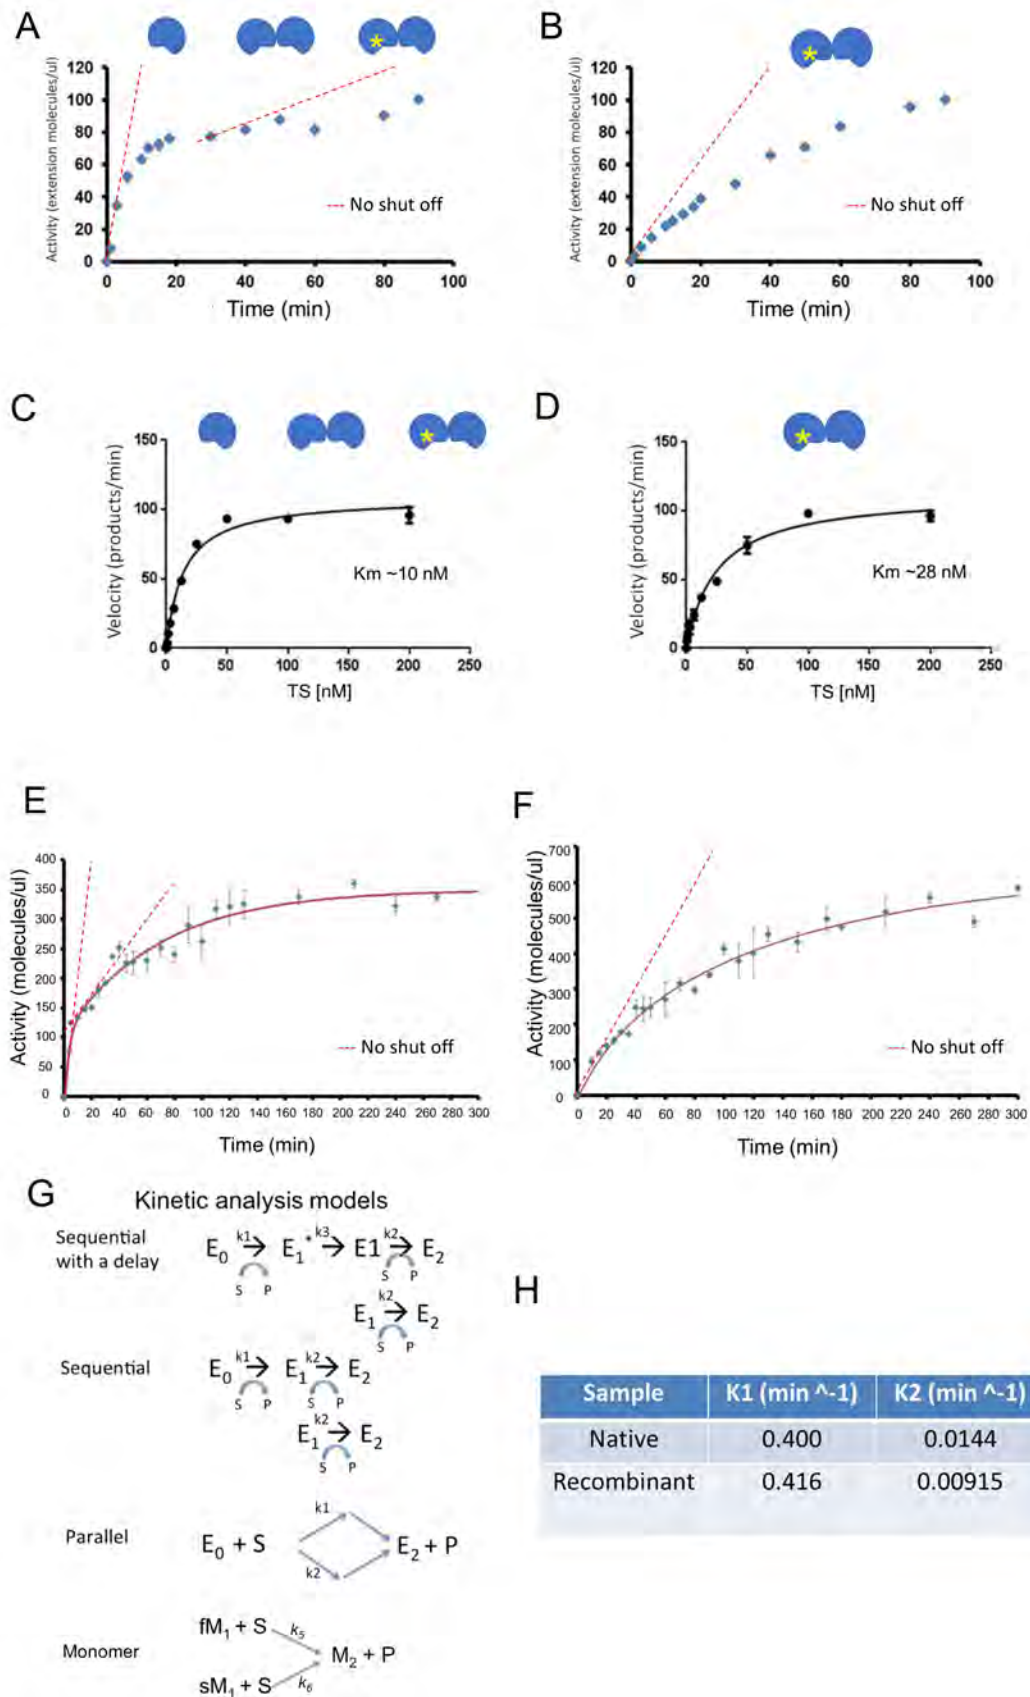

869 **Figure 5: Sequential binding of two active sites to substrates suggests a sequential kinetic**  
870 **model for dimeric enzymes. (A)** Schematic representation of tethered telomerase being tested  
871 for whether two active sites are saturated by substrates at the same time. **(B)** ddTRAP assay on  
872 samples obtained from experiments as designed in panel A. Telomerase extension products were  
873 collected and equal amounts were used for the ddTRAP assay. Error bars: *s.d.* (n=3). **(C)**  
874 ddTRAP assay of tethered telomerase performed at varying times for extension 1 only. Blue,  
875 grey, and black bars represent 30, 90, and 120 min respectively. Extensions 2 and 3 were all  
876 performed for 2 hours. “Ctl\*\*” samples were time delayed samples that were left at room  
877 temperature for five hours before starting the extension reaction for a duration of 30, 90 or 120  
878 min. Error bars: *s.d.* (n=3).

879

A

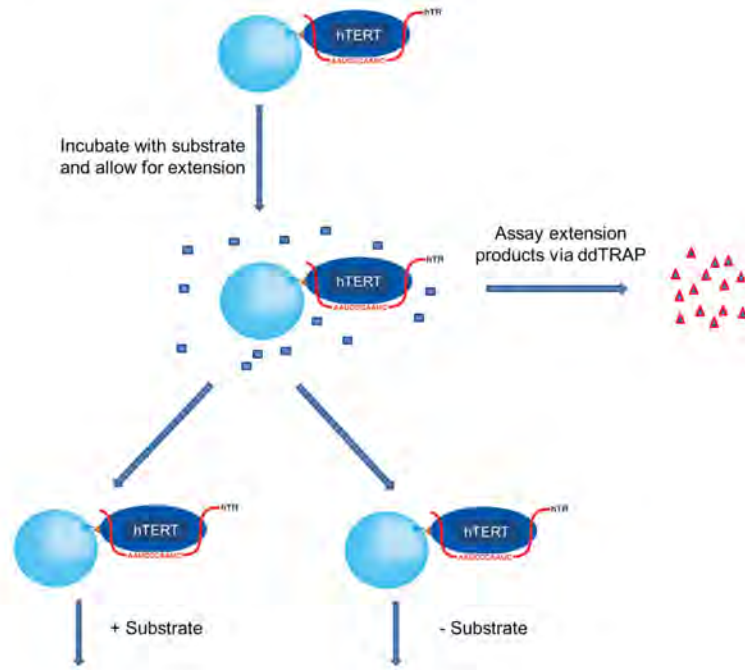

B

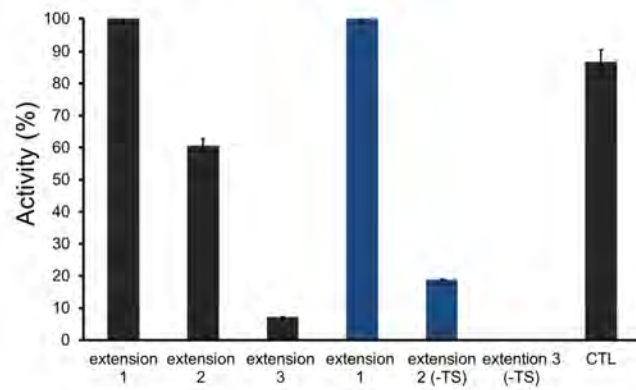

C

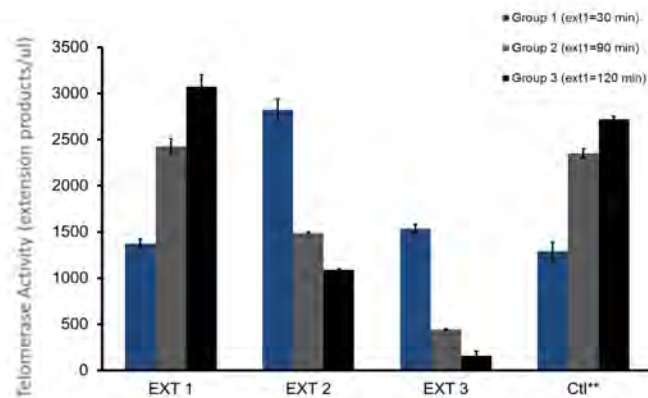

880 **Figure 6: iTAFs reactivate inactive telomerase holoenzymes.**

881 **(A)** Schematic representation of catalytically exhausted tethered telomerase enzymes ( $E_2$  or  $M_2$ )  
882 mixed with telomerase-negative cell lysate (of BJ cells) to test enzyme reactivation. **(B)**  
883 Telomerase reactivation assay performed using ddTRAP. Error bars: *s.d.* (n=3). Inactive  
884 telomerase treated with the BJ cell lysate showed a 7-fold increase in activity compared to the  
885 background readout from control enzymes. BJ cell lysate shows no telomerase activity. **(C)** &  
886 **(D)** Time courses for the tethered telomerase before and after treatment with the iTAFs (from BJ  
887 cells). The continued lines were fitted with the sequential model with a short delay. After  
888 reactivation, the slow-acting enzyme is dominating (75%). Error bars: *s.d.* (n=3). The dashed  
889 lines represent the amount of products if the active sites remained continuously active. **(E)** iTAF  
890 fractions were heat-inactivated or treated with the DNase before being incubated with the  
891 inactive tethered telomerase. The background activity was from the tether  $E_2$  enzymes with  
892 residual activity. Other samples were normalized against the control. Error bars: *s.d.* (n=3). **(F)**  
893 Cell lysates of SAOS-2 and SKLU-1 contain iTAF activity. These are two alternative  
894 lengthening telomere (ALT) cells lines that have no telomerase activity.

895

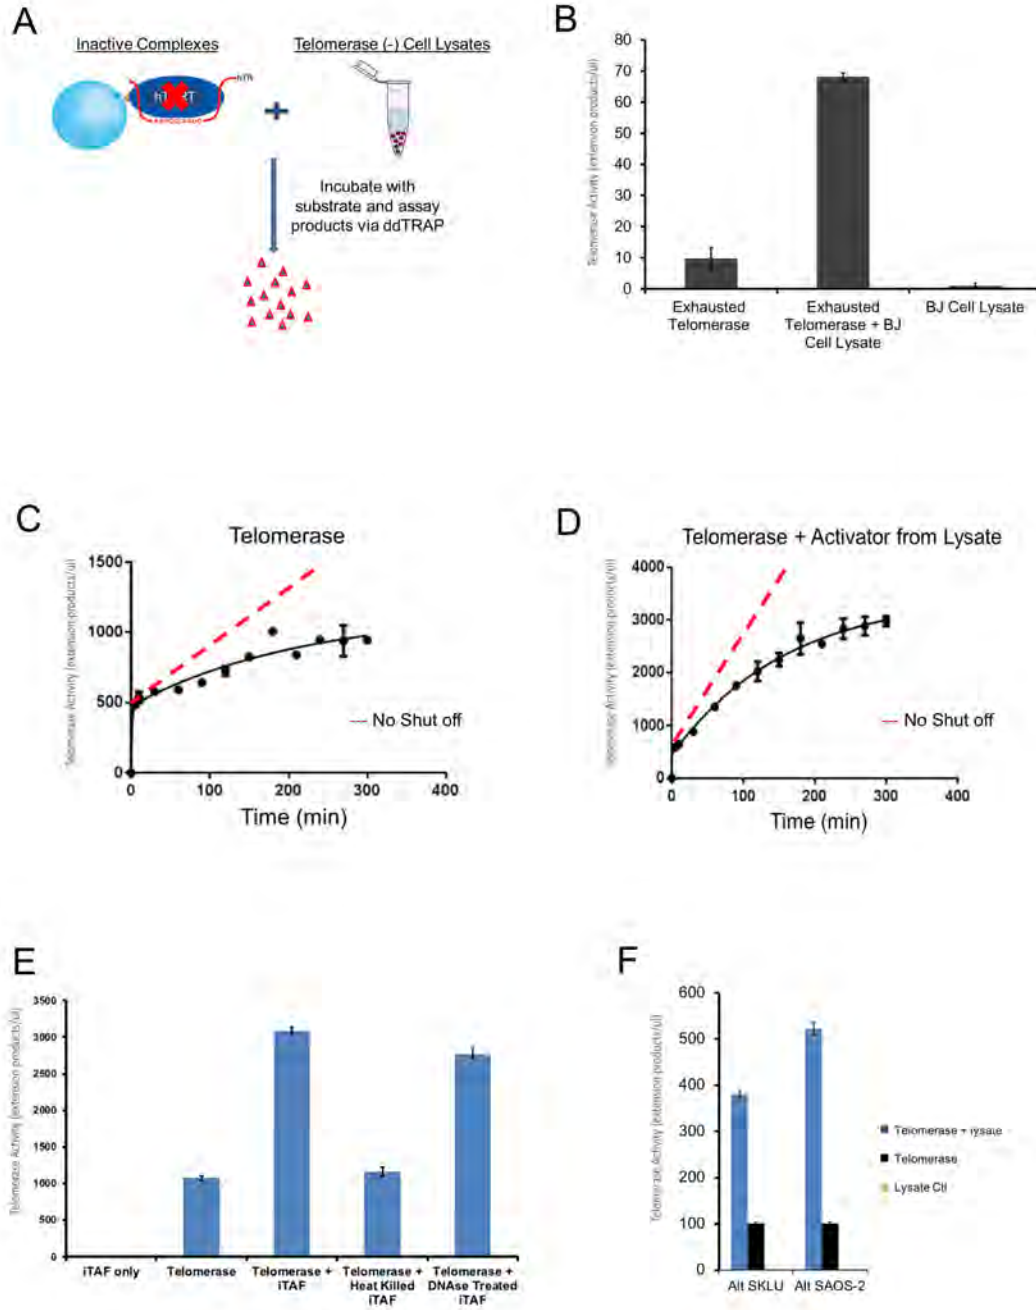

896 **Figure 7: Kinetic ON-OFF control of human telomerase holoenzyme.**

897 **(A)** Each active site undergoes catalysis-dependent shutoff. During the processive catalytic  
898 reaction, after each translocation of the newly added repeats the enzyme has a frequency in  
899 falling off the substrate, which results in the shutdown of the active site. The iTAFs can  
900 reactivate the active site. The dashed line box denotes the processive catalysis of the telomerase  
901 activity. **(B)** A sequential model for the two active sites of the human telomerase holoenzyme  
902 and the parallel action of two different monomeric enzymes. Newly assembly dimeric enzymes  
903 ( $E_0$ ) have two active sites.  $E_1$  has its fast-acting site shutoff, and  $E_2$  has no activity.  $M_1$  has one  
904 active site and  $M_2$  none. The iTAFs can switch the inactive sites into active states through  $E_2 \rightarrow$   
905  $E_1$  or  $E_2 \rightarrow E_0$  with  $E_2 \rightarrow E_1$  dominating the reactivation or through  $M_2 \rightarrow M_1$ . The ratio between  
906 the switches of  $M_2$  to  $fM_1$  and to  $sM_1$  is unclear.

907



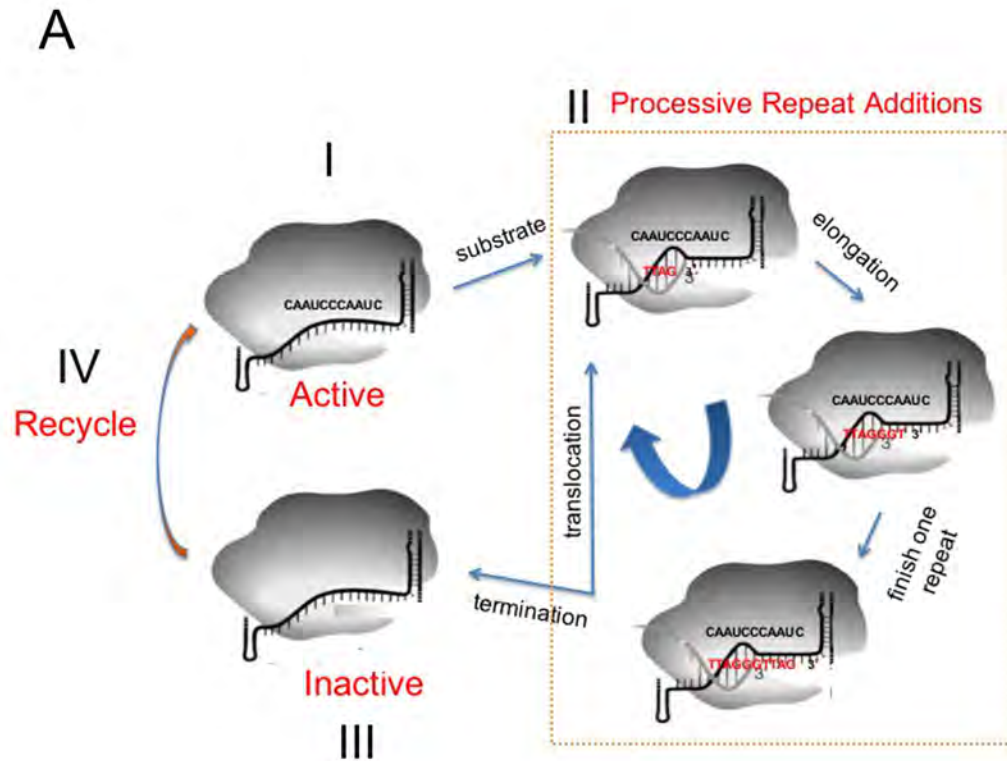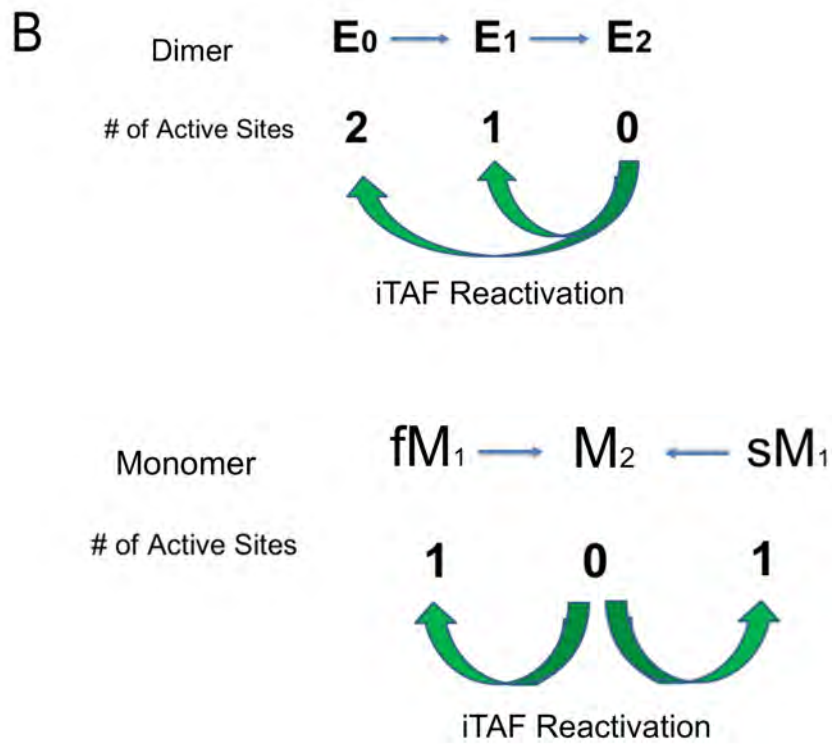

Source: http://biorxiv.org/content/10.1101/525733v1.full.pdf
